# Supplementary material
Source: PubMed Central journal article supplement (PMC6062397)
Supplement: TX-005-C5TX00464K-s001.pdf [file TX-005-C5TX00464K-s001.pdf]

**Supplemental Table 1 Primers used for qPCR.**

| <b>Genes</b>                   | <b>Forward primer</b>         | <b>Reverse primer</b>          |
|--------------------------------|-------------------------------|--------------------------------|
| <i>xbp-1s</i>                  | 5'-TGCTGAGTCCGCAGCAGGTG3'     | 5'-GACTAGCAGACTCTGGGGAAGG3'    |
| <i>chop</i>                    | 5'-CATACACCACCACACCTGAAAG-3'  | 5'-CCGTTTCCTAGTTCTTCCTTGC-3'   |
| <i>Gpx</i>                     | 5'-CTCACCCGCTCTTTACCTTCCT-3'  | 5'-ACACCGGAGACCAAATGATGTACT-3' |
| <i>SOD1</i>                    | 5'-GCGGTGAACCAGTTGTGTTGTC-3'  | 5'-CAGTCACATTGCCCAGGTCTCC-3'   |
| <i>HO1</i>                     | 5'-ACTTTCAGAAGGGTCAGGTGTCC-3' | 5'-TTGAGCAGGAAGGCGGTCTTAG-3'   |
| <i>IL-6</i>                    | 5'-GAACAACGATGATGCACTTGCAG-3' | 5'-CCTTAGCCACTCCTTCTGTGAC-3'   |
| <i>TNF-<math>\alpha</math></i> | 5'-ACGTGGAAGTGGCAGAAGAG-3'    | 5'-CTCCTCCACTTGGTGGTTTG-3'     |
| <i>Gapdh</i>                   | 5'-GACTTCAACAGCAACTCCCAC-3'   | 5'-TCCACCACCCTGTTGCTGTA-3'     |

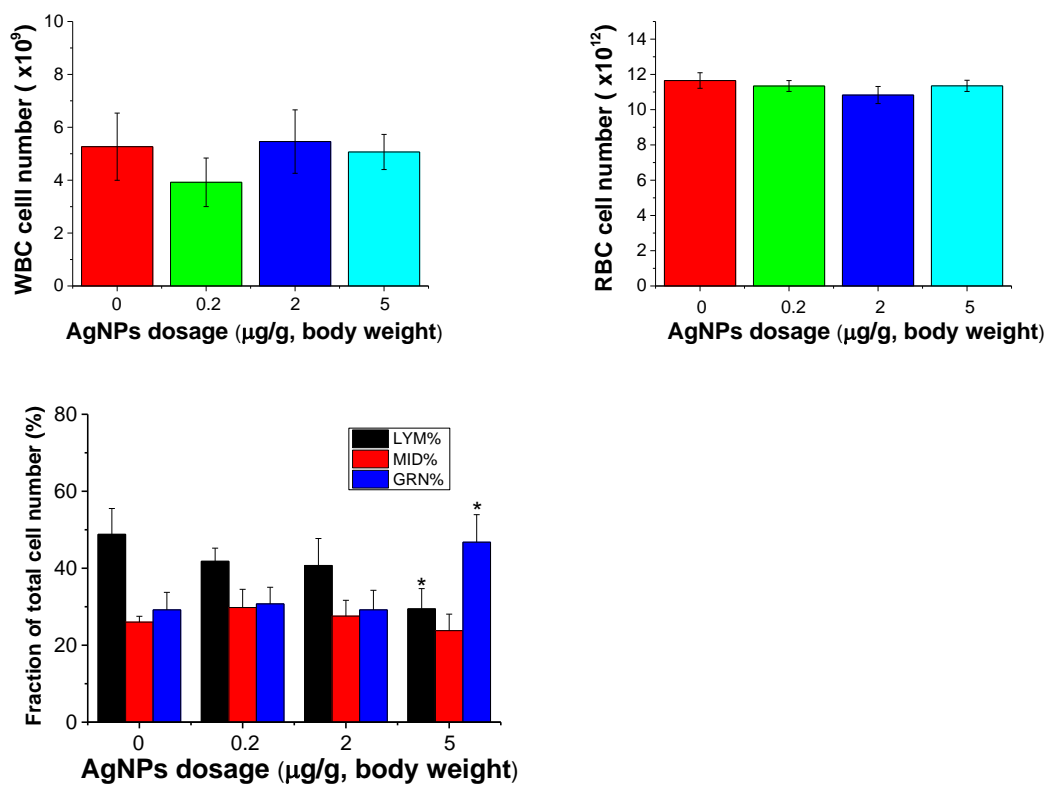

*Supplemental Fig. 1 Hematological parameters in the blood of mice after exposure to one single injection of AgNPs at 0.2 (L, Low), 2 (M, Middle) and 5 (H, High) µg/g dosages for 8 h.*

(A) The total number of white blood cells (WBC); (B) The total number of red blood cells (RBC); (C) The percentages of lymphocytes (LYM), precursor white cells (MID, minimum inhibitory dilution) and granulocytes (GRN) of the total cell counts.

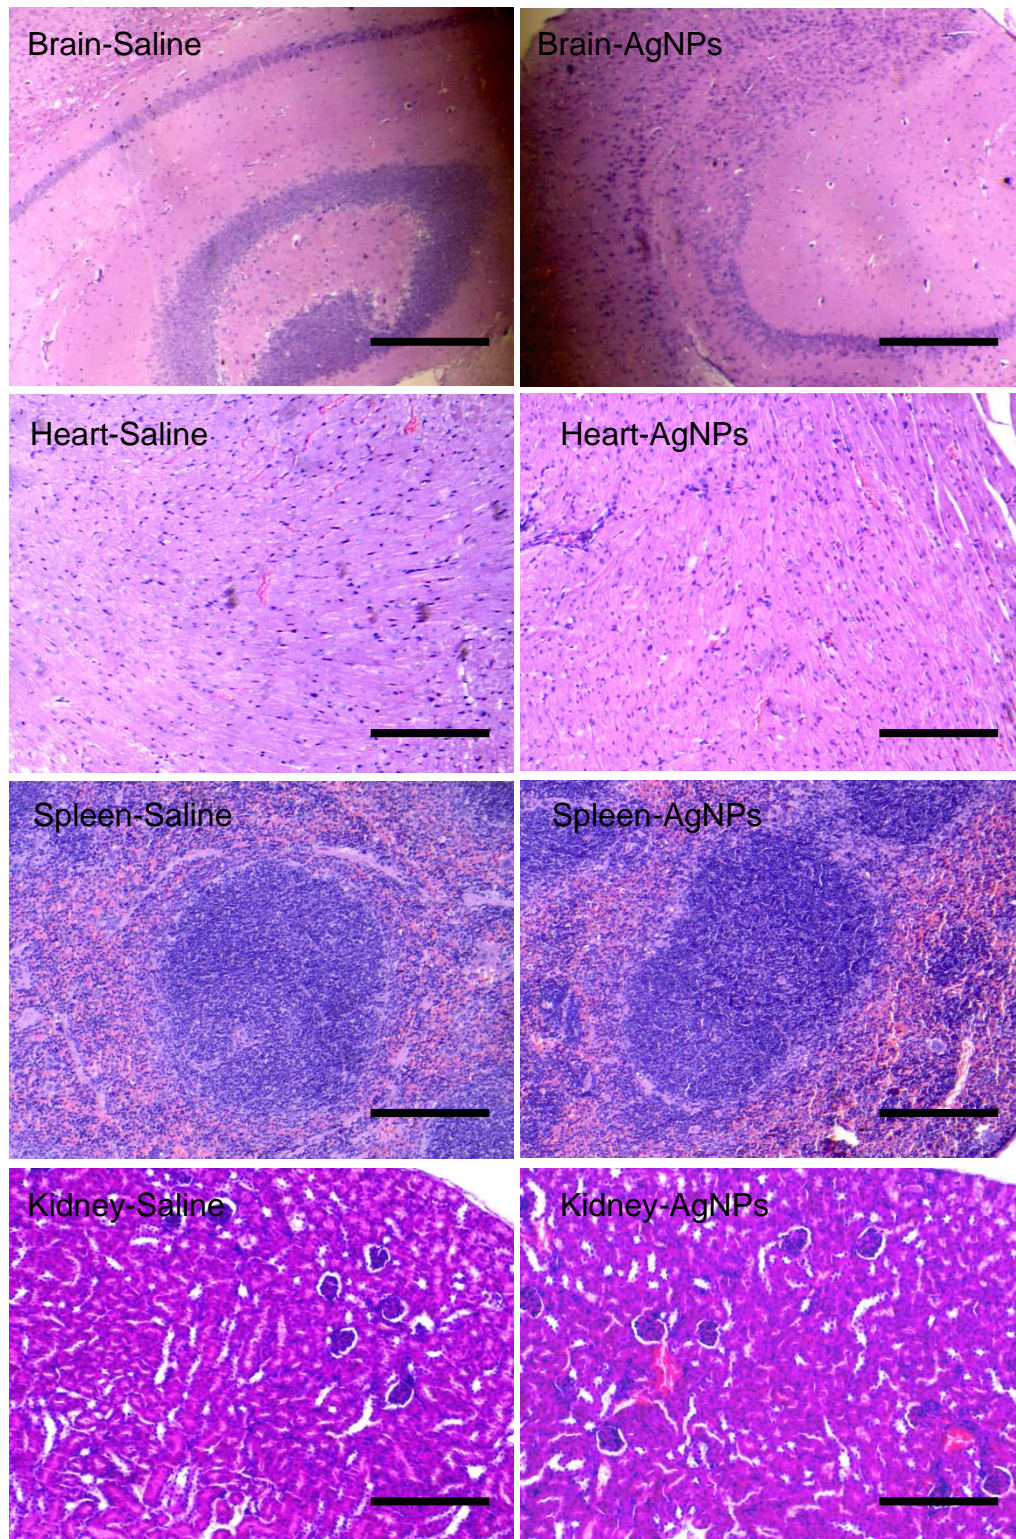

*Supplemental Fig. 2. Histopathological images of tissues after intravenous exposure to AgNPs at 5 µg/g for 8 h in mice. Scale bar = 200 µm.*

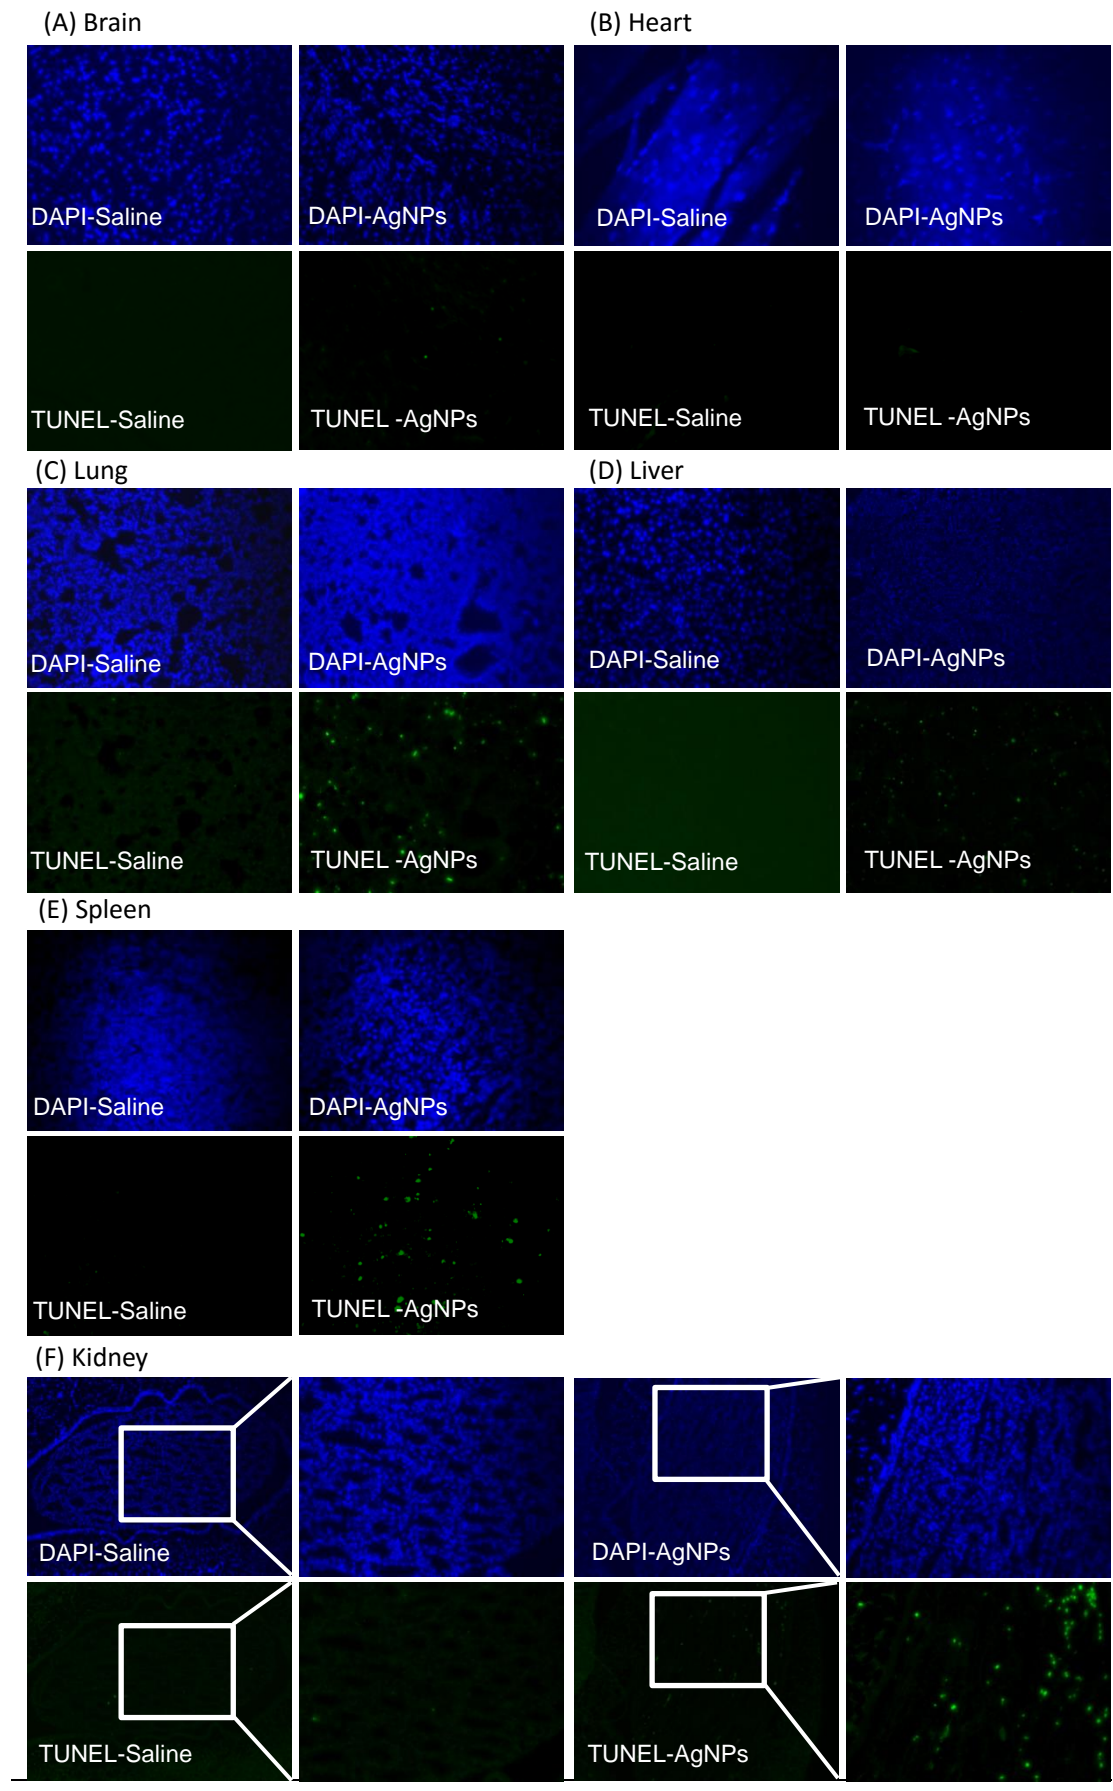

**Supplemental Fig. 3** Representative images of TUNEL assay from different organs after intravenous exposure to AgNPs at 5  $\mu\text{g/g}$  for 8 h in mice. Magnification of pictures is 20 $\times$ , except 50 $\times$  for amplified frames in kidney tissue.
